# Supplementary material for: 5′ Unlocked Nucleic Acid Modification Improves siRNA Targeting
Source: PubMed Central journal article supplement — Mol Ther Nucleic Acids. 2013 Jul 2;2(7):e103–. doi: 10.1038/mtna.2013.36 (PMC3732871; doi:10.1038/mtna.2013.36), 2013-07-02
Supplement: mtna201336x1.pdf [file mtna201336x1.pdf]

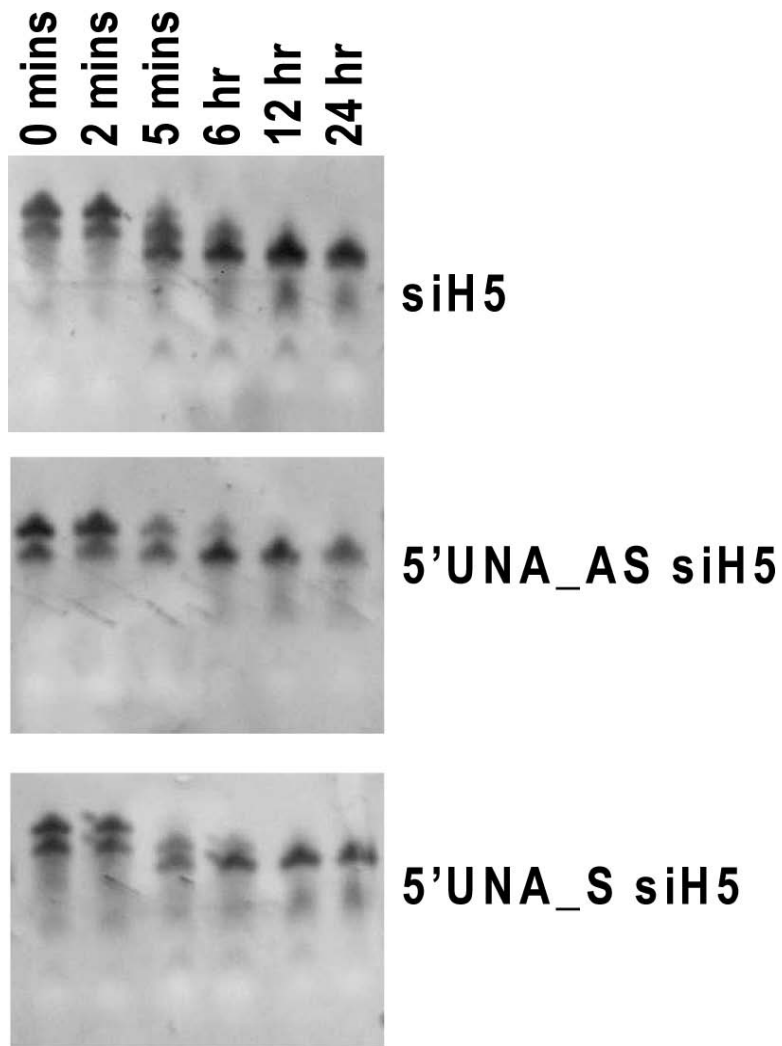

Supplementary Figure 1: The single 5' UNA modification does not dramatically alter the stability of the siRNAs.
