# Supplementary material for: 5′ Unlocked Nucleic Acid Modification Improves siRNA Targeting
Source: PubMed Central journal article supplement — Mol Ther Nucleic Acids. 2013 Jul 2;2(7):e103–. doi: 10.1038/mtna.2013.36 (PMC3732871; doi:10.1038/mtna.2013.36), 2013-07-02
Supplement: mtna201336x2.pdf [file mtna201336x2.pdf]

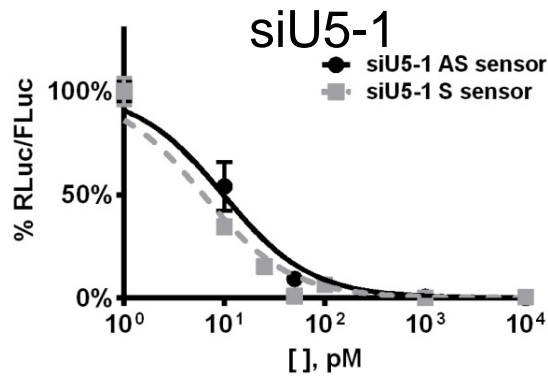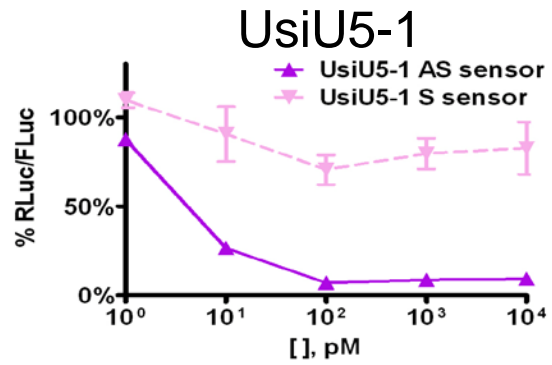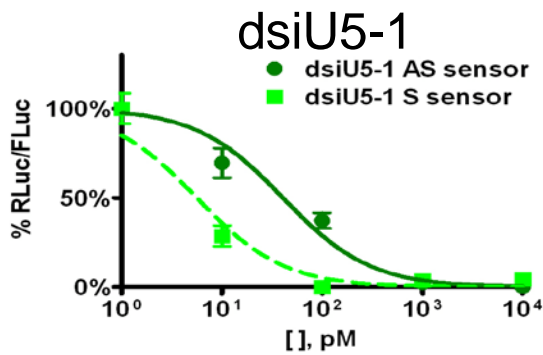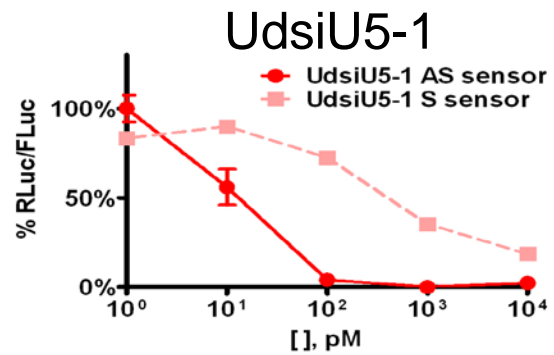

Supplementary Figure 2: The combined dsRNA and 5' UNA strand-blocking modification is generalizable to other parental si- and dsRNA sequences. Using another parental siRNA (siU5-1, left), we repeated strand-specific dual luciferase assays using 5' UNA-modified siRNAs (top) and dsRNAs (bottom). Assay performed as in Figure 4b. n = 2, in duplicate. mean +/- SEM.
